# Supplementary material for: Analysis of Rituximab Use, Time Between Rituximab and SARS-CoV-2 Vaccination, and COVID-19 Hospitalization or Death in Patients With Multiple Sclerosis
Source: PubMed Central journal article supplement (PMC9857265; doi:10.1001/jamanetworkopen.2022.48664), 2022-12-28
Supplement: jamanetwopen-e2248664-s001.pdf [file jamanetwopen-e2248664-s001.pdf]

## Supplementary Online Content

Smith JB, Gonzales EG, Li BH, Langer-Gould A. Analysis of rituximab use, time between rituximab and SARS-CoV-2 vaccination, and COVID-19 hospitalization or death in patients with multiple sclerosis. *JAMA Netw Open*. 2022;5(12):e2248664.  
doi:10.1001/jamanetworkopen.2022.48664

**eMethods.** Supplemental Methods

**eTable 1.** SARS-CoV-2 Variants Stratified by COVID-19 Outcomes Among Vaccinated MS Patients

**eTable 2.** Association of SARS-CoV-2 Vaccination With COVID-19 Hospitalization Among RTX-Treated Persons With MS

This supplementary material has been provided by the authors to give readers additional information about their work.

## eMethods. Supplemental Methods

**Primary Outcome Measure:** The primary outcome was defined *a priori* as either requiring hospitalization or death due to COVID-19. As no COVID-19 related deaths were observed, the analyses reflect risk of hospitalization only.

**Details of Exclusion Criteria:** Treatment with DMTs during the study period known or suspected to interfere with vaccine efficacy (fingolimod n=65, teriflunomide n=3, and azathioprine n=9); treatment with other B-cell depleting agents (ocrelizumab=0, ofatumumab n=3); or partial vaccination defined as only one dose of a mRNA vaccine or SARS-CoV-2 infection occurred within 14 days of the 2<sup>nd</sup> dose of the initial mRNA vaccine series (n=65).

**Definition of Disease Modifying Therapy Use:** Rituximab use was defined as at least one infusion within 2 years prior to receiving the first vaccine dose. Use of the other disease modifying therapies was defined as at least 4 infusions of natalizumab or 3 months of dispensed prescriptions for glatiramer acetate, beta-interferons, or dimethyl fumarate within 1 year prior to the first vaccine dose.

**Definition of boosted:** We defined receiving a booster vaccination as at least 1 additional vaccine dose after completion of the initial vaccination series (2 mRNA vaccines or 1 viral vector vaccine).

**Power to detect difference in COVID-19 Mortality Rate:** Under the hypothesis that rituximab treatment significantly interferes with vaccine efficacy, then the expected COVID-19 mortality rate should be similar to our unvaccinated rituximab-treated patients, which was 0.24% when alpha was the dominant strain and 0.42% when delta dominated. Based on type 1 error 0.05 and two tailed test, the study is powered on 80.6% for an expected mortality of 0.42% and 57.8% for expected mortality of 0.24%.

| <b>eTable 1. SARS-CoV-2 Variants Stratified by COVID-19 Outcomes Among Vaccinated MS Patients</b> |                    |                      |                                  |
|---------------------------------------------------------------------------------------------------|--------------------|----------------------|----------------------------------|
|                                                                                                   | <b>No COVID-19</b> | <b>Mild COVID-19</b> | <b>Hospitalized For COVID-19</b> |
|                                                                                                   | <b>n=3476</b>      | <b>n=464</b>         | <b>n=34</b>                      |
| <b>Outcomes per variant, n (%)</b>                                                                |                    |                      |                                  |
| <b>Alpha</b> (12/15/2020-5/31/2021)                                                               |                    |                      |                                  |
| No/other DMT                                                                                      | 2449 (99.9)        | 2 (0.08)             | 0 (0)                            |
| Rituximab                                                                                         | 1514 (99.9)        | 2 (0.1)              | 0 (0)                            |
| Rituximab any vaccine dose >6mos                                                                  | 1238 (99.8)        | 2 (0.2)              | 0 (0)                            |
| Rituximab all vaccine doses ≤6mos                                                                 | 276 (100)          | 0 (0)                | 0 (0)                            |
| <b>Delta</b> (6/1/2021-11/30/21)                                                                  |                    |                      |                                  |
| No/other DMT                                                                                      | 2400 (98.2)        | 41 (1.7)             | 4 (0.2)                          |
| Rituximab                                                                                         | 1454 (96.4)        | 46 (3.1)             | 9 (0.6)                          |
| Rituximab any vaccine dose >6mos                                                                  | 1205 (97.7)        | 25 (2.0)             | 3 (0.2)                          |
| Rituximab all vaccine doses ≤6mos                                                                 | 249 (90.2)         | 21 (7.6)             | 6 (2.2)                          |
| <b>Omicron</b> (12/1/2021-2/15/2022)                                                              |                    |                      |                                  |
| No/other DMT                                                                                      | 2193 (92.9)        | 164 (7.0)            | 3 (0.1)                          |
| Rituximab                                                                                         | 1204 (84.1)        | 209 (14.6)           | 18 (1.3)                         |
| Rituximab any vaccine dose >6mos                                                                  | 1009 (84.8)        | 172 (14.5)           | 9 (0.8)                          |
| Rituximab all vaccine doses ≤6mos                                                                 | 195 (80.9)         | 37 (15.4)            | 9 (3.7)                          |

Abbreviations: SARS-CoV-2=severe acute respiratory syndrome coronavirus 2; COVID-19=coronavirus disease 2019; MS=multiple sclerosis; DMT=disease-modifying therapies; mos=months

**eTable 2.** Association of SARS-CoV-2 Vaccination With COVID-19 Hospitalization Among RTX-Treated Persons With MS\*

| Variable                            | Crude OR | 95% CI |      | p-value | Adjusted OR | 95% CI |      | p-value |
|-------------------------------------|----------|--------|------|---------|-------------|--------|------|---------|
| Age, years                          | 1.02     | 0.99   | 1.04 | 0.16    | 1.02        | 0.99   | 1.05 | 0.14    |
| Female Sex (ref=male)               | 0.96     | 0.53   | 1.76 | 0.90    |             |        |      |         |
| Race/ethnicity (ref=other)          |          |        |      |         |             |        |      |         |
| White                               | 0.71     | 0.41   | 1.24 | 0.23    |             |        |      |         |
| MS Disability (ref=cane or lower)   |          |        |      |         |             |        |      |         |
| Walker or worse                     | 1.94     | 1.02   | 3.67 | 0.04    | 1.74        | 0.85   | 3.59 | 0.13    |
| Elixhauser Comorbidity Index        | 1.10     | 0.95   | 1.28 | 0.20    | 1.08        | 0.91   | 1.28 | 0.41    |
| <b>Vaccination Characteristics</b>  |          |        |      |         |             |        |      |         |
| Vaccination status (ref=vaccinated) |          |        |      |         |             |        |      |         |
| <b>Unvaccinated</b>                 | 3.49     | 2.01   | 6.04 | <0.001  | 4.07        | 2.29   | 7.24 | <0.001  |
| <b>Rituximab Characteristics</b>    |          |        |      |         |             |        |      |         |
| Time since last RTX dose (months)   | 0.95     | 0.90   | 1.00 | 0.03    | 0.94        | 0.89   | 0.99 | 0.02    |
| Dose at last infusion (ref<1000mg)  |          |        |      |         |             |        |      |         |
| >=1000mg                            | 1.93     | 0.93   | 4.02 | 0.08    | 1.11        | 0.49   | 2.50 | 0.81    |
| Total cumulative dose (ref<9000mg)  |          |        |      |         |             |        |      |         |
| >=9000mg                            | 3.64     | 1.73   | 7.67 | <0.001  | 2.51        | 1.07   | 5.87 | 0.03    |

\*Following availability of vaccines for RTX-MS (12/15/2020) through end of study period (2/15/2022)

Abbreviations: SARS-CoV-2=severe acute respiratory syndrome coronavirus 2; COVID-19=coronavirus disease 2019;

RTX=rituximab; MS=multiple sclerosis; OR=odds ratio; 95% CI=95% confidence interval; ref=reference; mg=milligrams
