# Supplementary material for: Analysis of Rituximab Use, Time Between Rituximab and SARS-CoV-2 Vaccination, and COVID-19 Hospitalization or Death in Patients With Multiple Sclerosis
Source: PubMed Central journal article supplement (PMC9857265; doi:10.1001/jamanetworkopen.2022.48664), 2022-12-28
Supplement: jamanetwopen-e2248664-s002.pdf [file jamanetwopen-e2248664-s002.pdf]

## Data Sharing Statement

Smith. Analysis of Rituximab Use, Time Between Rituximab and SARS-CoV-2 Vaccination, and COVID-19 Hospitalization or Death in Patients With Multiple Sclerosis. *JAMA Netw Open*. Published December 28, 2022. doi:10.1001/jamanetworkopen.2022.48664

### Data

**Data available:** No

### Additional Information

**Explanation for why data not available:** Due to KPSC's institutional review board, data are available upon reasonable request.
